# Supplementary material for: Complex dissolved organic matter (DOM) on the roof of the world – Tibetan DOM molecular characteristics indicate sources, land use effects, and processing along the fluvial–limnic continuum
Source: Copernicus journal article supplement (doi:10.5194/bg-20-3011-2023), 2023-07-27
Supplement: Supplementary file 1 [file bg-20-3011-2023-supplement.pdf]

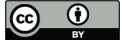

*Supplement of*

**Complex dissolved organic matter (DOM) on the roof of the world – Tibetan DOM molecular characteristics indicate sources, land use effects, and processing along the fluvial–limnic continuum**

**Philipp Maurischat et al.**

*Correspondence to:* Philipp Maurischat ([philipp.maurischat@uni-oldenburg.de](mailto:philipp.maurischat@uni-oldenburg.de))

The copyright of individual parts of the supplement might differ from the article licence.

### In-line standard (NEqPIW DOM) drift protocol

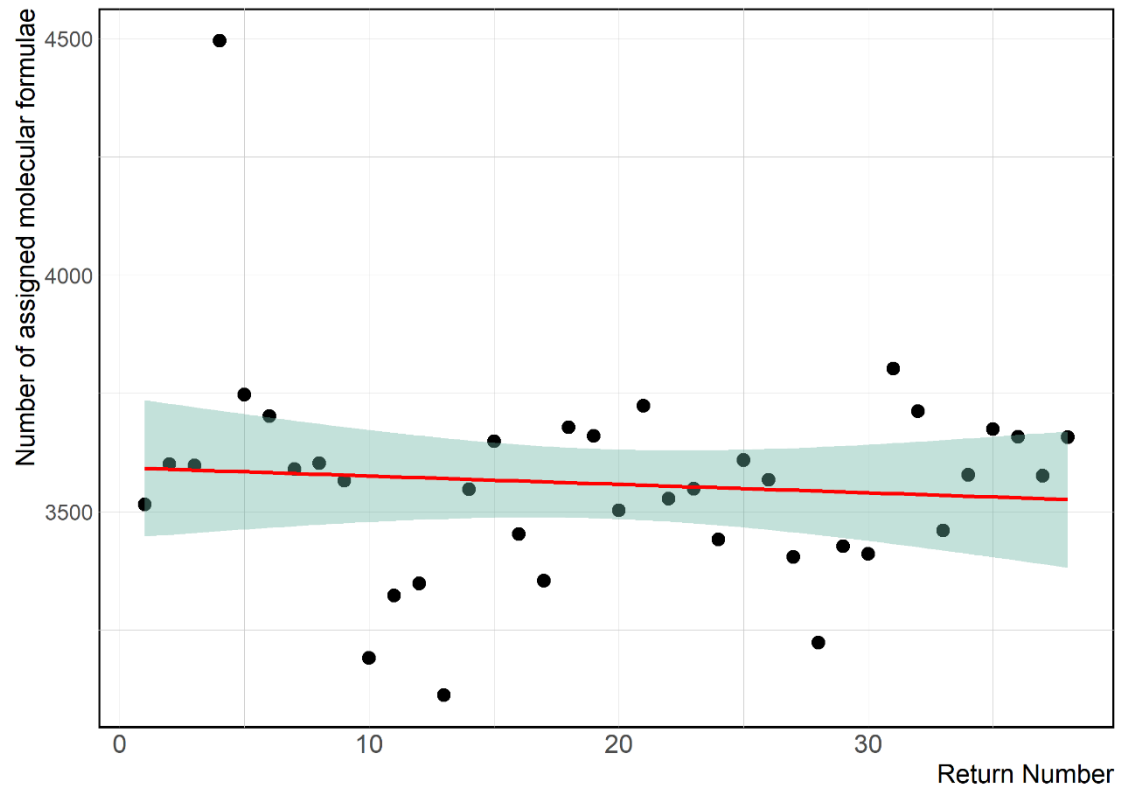

16  
17 Figure S1: Linear model (red) with confidence interval of 95% (green) for the in-line standard (NEqPIW  
18 DOM (Green et al., 2015); n=38)

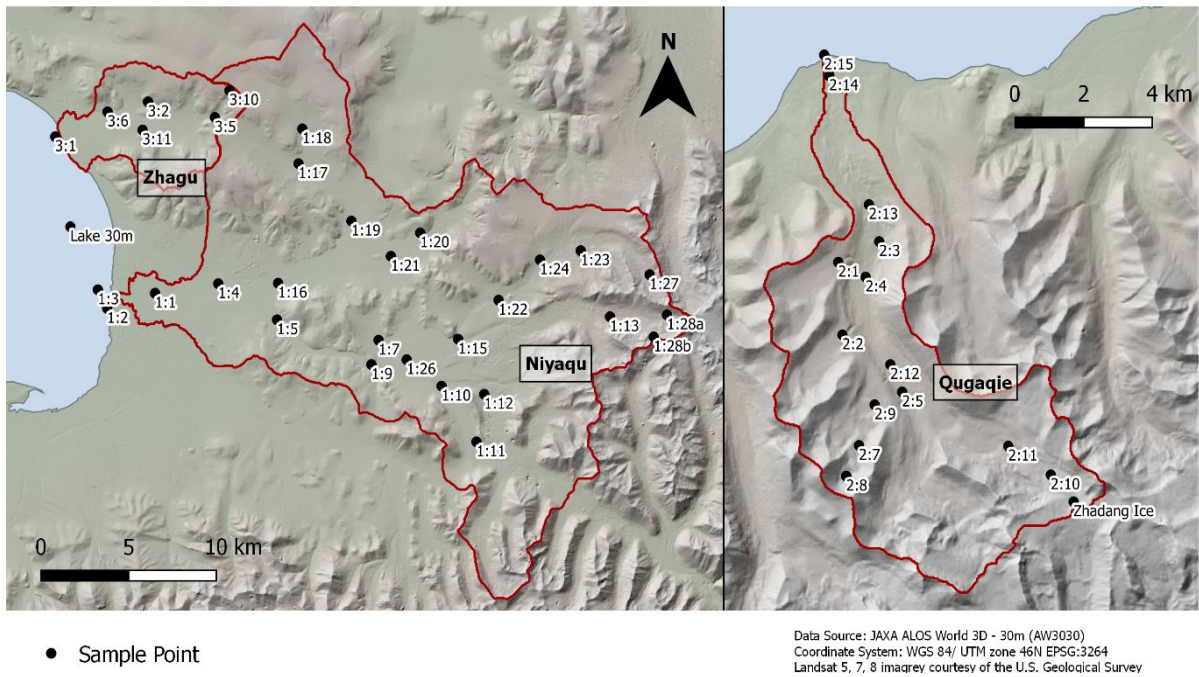

20

21 Figure S2: Individual IDs for the samples

22 Table S1: Multiple pairwise comparisons (Kruskal-Wallis H) with Bonferroni post-hoc correction for  
 23 the independent factor: Site. Significance level  $\alpha = 0.05$  (p value) are only reported when significant  
 24 within groups, *n.s.* = not significant. Degrees of freedom: 2. Significant differences of sites are given  
 25 for significant tests, letters (*a,b*) denote significant differences between groups.

| Parameter             | p value     | Niyaqu     | Qugaqie  | Zhagu       |
|-----------------------|-------------|------------|----------|-------------|
| N molecular count     | <i>n.s.</i> |            |          |             |
| S molecular count     | 0.005       | <i>a</i>   | <i>b</i> | <i>a,b</i>  |
| P molecular count     | <i>n.s.</i> |            |          |             |
| $A_{i\text{mod}}$     | <i>n.s.</i> |            |          |             |
| DBE                   | <i>n.s.</i> |            |          |             |
| Total molecular count | <i>n.s.</i> |            |          |             |
| AROR                  | <i>n.s.</i> |            |          |             |
| AROP                  | <i>n.s.</i> |            |          |             |
| HUSOR                 | 0.000       | <i>a</i>   | <i>b</i> | <i>a</i>    |
| HUSOP                 | 0.000       | <i>a</i>   | <i>b</i> | <i>a,b</i>  |
| USOR                  | 0.020       | <i>a</i>   | <i>b</i> | <i>a,b</i>  |
| USOP                  | 0.007       | <i>a</i>   | <i>a</i> | <i>b</i>    |
| USN                   | <i>n.s.</i> |            |          |             |
| SAT                   | <i>n.s.</i> |            |          |             |
| $I_{\text{DEG}}$      | 0.004       | <i>a</i>   | <i>a</i> | <i>b</i>    |
| $I_{\text{TERR}}$     | <i>n.s.</i> |            |          |             |
| $I_{\text{oS}}$       | 0.04        | <i>a</i>   | <i>a</i> | <i>b</i>    |
| CHO                   | 0.04        | <i>a,b</i> | <i>a</i> | <i>b</i>    |
| OC                    | <i>n.s.</i> |            |          |             |
| HC                    | 0.009       | <i>a</i>   | <i>b</i> | <i>a, b</i> |

26

27

29 Table S2: Multiple pairwise comparisons (Kruskal-Wallis H) with Bonferroni post-hoc correction for  
 30 the independent factor: Sample categories. Significance level  $\alpha = 0.05$  (p value) are only reported  
 31 when significant within groups, *n.s.* = not significant. Degrees of freedom: 2. Significant differences of  
 32 sites are given for significant tests, letters (*a,b*) denote significant differences between groups.

| Parameter             | p value     | Glacial effluent | Stream water | Brackish water |
|-----------------------|-------------|------------------|--------------|----------------|
| N molecular count     | <i>n.s.</i> |                  |              |                |
| S molecular count     | <i>n.s.</i> |                  |              |                |
| P molecular count     | <i>n.s.</i> |                  |              |                |
| Ai <sub>mod</sub>     | <i>n.s.</i> |                  |              |                |
| DBE                   | <i>n.s.</i> |                  |              |                |
| Total molecular count | <i>n.s.</i> |                  |              |                |
| AROR                  | <i>n.s.</i> |                  |              |                |
| AROP                  | 0.05        | <i>a</i>         | <i>a,b</i>   | <i>b</i>       |
| HUSOR                 | <i>n.s.</i> |                  |              |                |
| HUSOP                 | <i>n.s.</i> |                  |              |                |
| USOR                  | <i>n.s.</i> |                  |              |                |
| USOP                  | <i>n.s.</i> |                  |              |                |
| USN                   | <i>n.s.</i> |                  |              |                |
| SAT                   | <i>n.s.</i> |                  |              |                |
| I <sub>DEG</sub>      | <i>n.s.</i> |                  |              |                |
| I <sub>TERR</sub>     | <i>n.s.</i> |                  |              |                |
| IoS                   | <i>n.s.</i> |                  |              |                |
| CHO                   | <i>n.s.</i> |                  |              |                |
| OC                    | <i>n.s.</i> |                  |              |                |
| HC                    | <i>n.s.</i> |                  |              |                |

33

34 Table S3: Loadings of the samples for the three NMDS dimensions. SCN = Niyaqu catchment, SCQ =  
 35 Qugaqie catchment, SCZ =Zhagu catchment.

| Sample ID | NMDS 1   | NMDS 2   | NMDS 3   |
|-----------|----------|----------|----------|
| SCN_1_2   | 0,087685 | -1,1772  | 0,346675 |
| SCN_1_4   | 0,072454 | -1,06426 | 0,291306 |
| SCN_1_1   | -0,11736 | -0,622   | 0,06511  |
| SCN_1_16  | 0,074152 | -1,206   | 0,336504 |
| SCN_1_17  | 0,059853 | -1,17546 | 0,293232 |
| SCN_1_18  | 0,054424 | -1,16704 | 0,402607 |
| SCN_1_19  | -0,02776 | -0,96675 | 0,213587 |
| SCN_1_20  | -0,03149 | -1,06611 | 0,11981  |
| SCN_1_3   | -0,3843  | -0,09443 | -0,07249 |
| SCN_1_22  | -0,00024 | -1,01415 | 0,179729 |
| SCN_1_23  | 0,147413 | -1,29735 | 0,56202  |
| SCN_1_24  | 0,00635  | -0,95761 | 0,152191 |
| SCN_1_27  | 0,052577 | -1,09517 | 0,232781 |
| SCN_1_28a | 0,344206 | -0,21461 | 0,159075 |
| SCN_1_28b | 0,658598 | -0,4567  | 0,205128 |
| SCQ_2_1   | 0,122104 | -1,2393  | 0,527872 |
| SCQ_2_2   | 0,004387 | -0,11855 | -0,10717 |
| SCQ_2_3   | -0,01154 | -0,4253  | -0,0564  |
| SCQ_2_5   | 0,157962 | -0,98272 | 0,342997 |
| SCQ_2_7   | 0,263631 | -1,07548 | 0,495036 |

|                 |          |          |          |
|-----------------|----------|----------|----------|
| SCQ_2_10        | 0,235255 | -0,96557 | 0,4106   |
| SCQ_2_11        | 0,143729 | -1,16501 | 0,428035 |
| SCQ_2_12        | 0,15865  | -1,09184 | 0,404203 |
| SCN_1_5         | 0,011563 | -0,36718 | -0,08663 |
| SCQ_2_14        | -0,02347 | -0,1637  | -0,19761 |
| SCQ_2_15        | -0,02501 | -0,24661 | -0,1092  |
| SCN_1_6         | 0,237413 | -1,22035 | 1,052236 |
| SCZ_3_2         | 0,031523 | -0,38182 | -0,08328 |
| SCZ_3_5         | -0,08282 | -0,92493 | 0,022167 |
| SCZ_3_6         | -0,06704 | -0,28087 | -0,15221 |
| SCQ_Zhadang_Ice | 0,303771 | -0,83211 | 0,430128 |
| SCN_1_21        | 0,312109 | -0,00836 | 0,147803 |
| SCQ_2_4         | -0,28489 | -0,35436 | -0,13942 |
| SCQ_2_8         | 0,134136 | -0,22386 | 0,011247 |
| SCQ_2_9         | 0,152178 | -0,37412 | 0,042017 |
| SCQ_2_13        | 0,483425 | -0,64943 | 0,133389 |
| SCN_1_7         | 0,254065 | -0,9631  | 1,056203 |
| SCN_1_9         | 0,339653 | -0,95607 | 1,101475 |
| SCN_1_10        | 0,296664 | -0,8365  | 0,993272 |
| SCN_1_11        | 0,286045 | -0,86696 | 0,971239 |
| SCN_1_12        | -0,23311 | -0,79461 | 0,000412 |
| SCN_1_13        | -0,19292 | -0,94946 | 0,060638 |
| SCN_1_15        | -0,15378 | -1,00839 | 0,110429 |

36

37 Table S4: Scores of the internal variables for the two major NMDS dimensions.

| Internal variable | NMDS 1               | NMDS 2              |
|-------------------|----------------------|---------------------|
| ARO               | -0. 84985682690839   | 0. 527013637164355  |
| USAT              | 0. 854196719207775   | 0. 519949963837554  |
| HUSAT             | -0. 407913273347075  | 0. 913020679627397  |
| SAT               | 0. 818688729963233   | 0. 574237549652745  |
| IDEG              | -0. 999240657827933  | 0. 0389629021455057 |
| IOS               | -0. 991295354085005  | 0. 131656830318386  |
| ITERR             | -0. 999524929030953  | 0. 0308207113102116 |
| Almod             | -0. 994525776528508  | -0. 104491529897732 |
| N                 | 0. 0535023920603983  | 0. 998567721310786  |
| P                 | -0. 0509217017689782 | 0. 998702648584127  |
| S                 | 0. 483014615080082   | 0. 875612289554595  |

38

39

40

41

42

43 Table S5: Scores of the external variables for the two major NMDS dimensions

| External variable | NMDS 1              | NMDS 2              |
|-------------------|---------------------|---------------------|
| FDOM              | -0. 783975814707886 | -0. 620791367492418 |
| DIC               | 0. 8054726857903    | -0. 592632898551675 |
| DOC               | -0. 837542331836805 | -0. 546372439258577 |

|             |                    |                    |
|-------------|--------------------|--------------------|
| δ13C        | -0.781167390095403 | -0.624321638782076 |
| Plant Cover | -0.84121127196077  | -0.540706571003297 |
| NO3         | -0.571521267093232 | 0.820587253898174  |

44

45 Table S6: Goodness of fit ( $R^2$ ) and p value of the internal variable vectors. Significant  $< \alpha$  (0.05)  
 46 variables are marked bold.

| Internal variable | $R^2$ | p value      |
|-------------------|-------|--------------|
| ARO               | 0.919 | <b>0.001</b> |
| USAT              | 0.882 | <b>0.001</b> |
| HUSAT             | 0.932 | <b>0.001</b> |
| SAT               | 0.549 | <b>0.001</b> |
| IDEG              | 0.626 | <b>0.001</b> |
| IOS               | 0.052 | 0.31         |
| ITERR             | 0.349 | <b>0.001</b> |
| Almod             | 0.664 | <b>0.001</b> |
| N                 | 0.887 | <b>0.001</b> |
| P                 | 0.554 | <b>0.001</b> |
| S                 | 0.77  | <b>0.001</b> |

47

48 Table S7: Goodness of fit ( $R^2$ ) and p value of the external variable vectors. Significant  $< \alpha$  (0.05)  
 49 variables are marked bold.

| External variable | $R^2$ | p value      |
|-------------------|-------|--------------|
| FDOM              | 0.197 | <b>0.019</b> |
| DIC               | 0.209 | <b>0.006</b> |
| DOC               | 0.116 | 0.089        |
| δ13C              | 0.016 | 0.7          |
| Plant Cover       | 0.051 | 0.345        |
| NO3               | 0.095 | 0.118        |

50

51 Table S8: Extraction efficiency of SPE-DOC samples; SCN =Niyaqu, SCQ= Qugaqie, SCZ = Zhagu, SCL=  
 52 Lake Nam Co.

| Sample ID | Extraction efficiency [%] |
|-----------|---------------------------|
| SCN_1_1   | 61.1                      |
| SCN_1_2   | 77.1                      |
| SCN_1_3   | 50.2                      |
| SCN_1_4   | 45.2                      |
| SCN_1_5   | 45.9                      |
| SCN_1_6   | 98.2                      |
| SCN_1_7   | 57.7                      |
| SCN_1_9   | 67.0                      |
| SCN_1_10  | 74.9                      |
| SCN_1_11  | 56.2                      |
| SCN_1_12  | 60.9                      |
| SCN_1_1   | 27.3                      |
| SCN_1_15  | 16.8                      |
| SCN_1_16  | 78.9                      |
| SCN_1_17  | 83.2                      |
| SCN_1_18  | 63.8                      |
| SCN_1_19  | 83.3                      |
| SCN_1_20  | 92.7                      |

|                 |                                             |
|-----------------|---------------------------------------------|
| SCN_1_21        | 91.5                                        |
| SCN_1_22        | 68.4                                        |
| SCN_1_23        | 84.7                                        |
| SCN_1_24        | 55.5                                        |
| SCN_1_2         | 79.6                                        |
| SCN_1_27        | 84.7                                        |
| SCN_1_28a       | >50%; initial DOC < 25 $\mu\text{M L}^{-1}$ |
| SCN_1_28b       | >50%; initial DOC < 25 $\mu\text{M L}^{-1}$ |
| SCQ_2_1         | 46.8                                        |
| SCQ_2_2         | 43.7                                        |
| SCQ_2_3         | 52.8                                        |
| SCQ_2_4         | 50.6                                        |
| SCQ_2_5         | 45.5                                        |
| SCQ_2_6         | 55.9                                        |
| SCQ_2_7         | 37.7                                        |
| SCQ_2_8         | 43.8                                        |
| SCQ_2_9         | 52.5                                        |
| SCQ_2_10        | 37.8                                        |
| SCQ_2_11        | 54.7                                        |
| SCQ_2_12        | 43.7                                        |
| SCQ_2_13        | 84.1                                        |
| SCQ_2_14        | 44.1                                        |
| SCQ_2_15        | 67.5                                        |
| SCQ_Zhadang_Ice | >50%; initial DOC < 25 $\mu\text{M L}^{-1}$ |
| SCZ_3_1         | 34.1                                        |
| SCZ_3_2         | 73.0                                        |
| SCZ_3_5         | 50.1                                        |
| SCZ_3_6         | 15.0                                        |
| SCZ_3_10        | 91.3                                        |
| SCL_SC2         | 41.0                                        |
| IHSS Standard   | 60.6                                        |

---

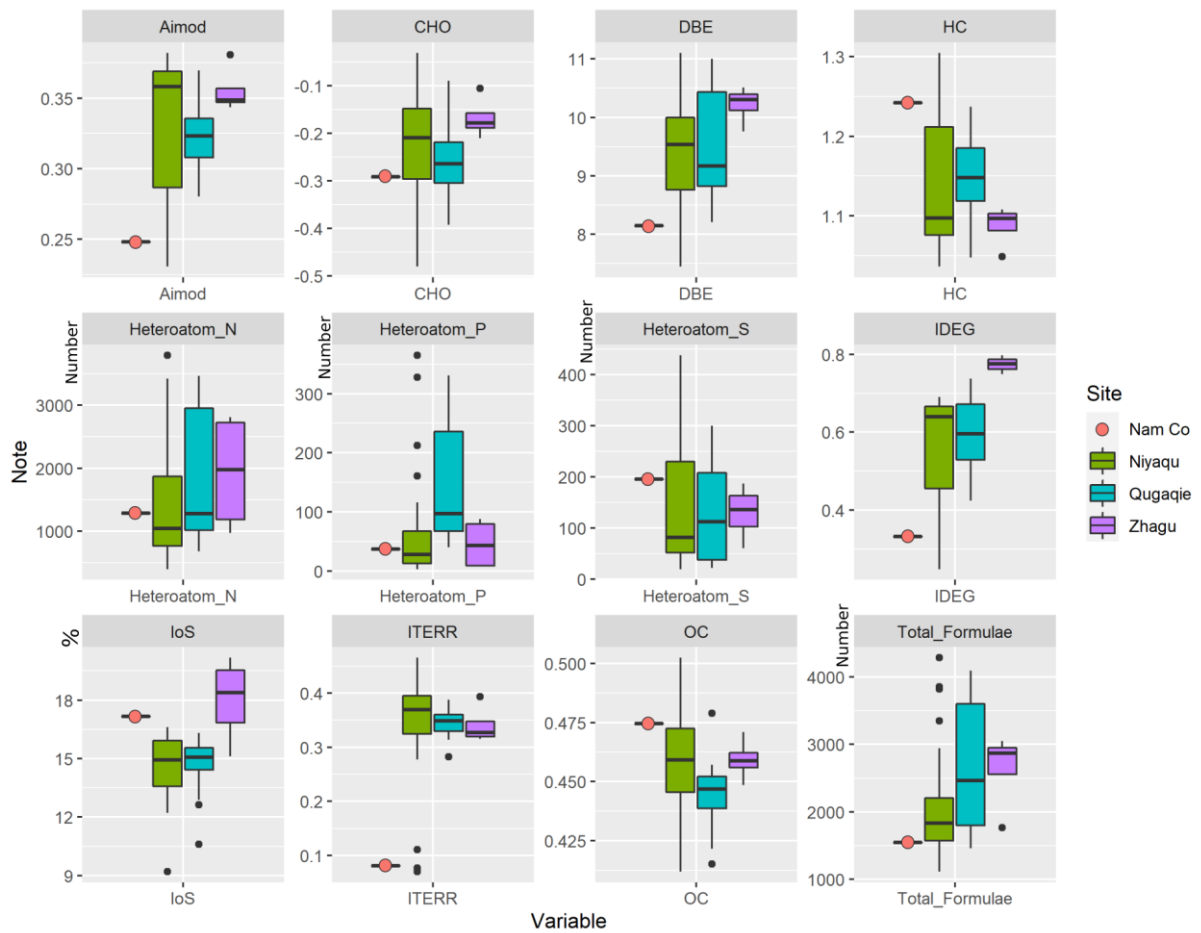

54 Figure S3: Boxplots corresponding to Table 1 of the main text body. Sites with  $n < 3$  are expressed as  
 55 individual points.



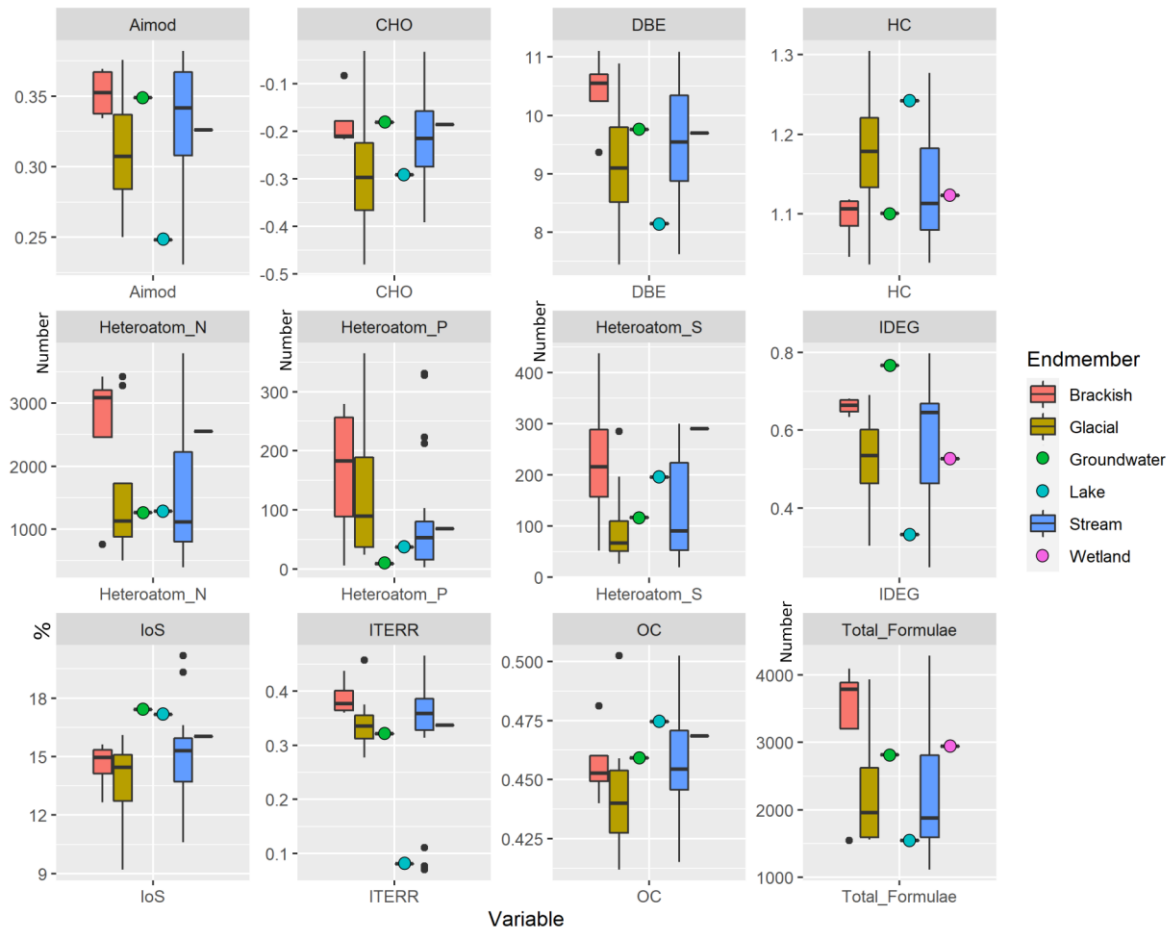

57 Figure S4: Boxplots corresponding to Table 2 of the main text body. Endmembers and sample  
 58 categories with  $n < 3$  are expressed as individual points.
